# Supplementary material for: Caspase-1 inhibition improves cognition without significantly altering amyloid and inflammation in aged Alzheimer disease mice
Source: PubMed Central journal article supplement (PMC9553979; doi:10.1038/s41419-022-05290-x), 2022-10-11
Supplement: 41419_2022_5290_MOESM1_ESM.pdf [file 41419_2022_5290_MOESM1_ESM.pdf]

Supplemental Material for:

**Caspase-1 inhibition improves cognition without significantly altering amyloid and inflammation in aged Alzheimer disease mice**

Joseph Flores<sup>1</sup>, Marie-Lyne Fillion<sup>1</sup>, and Andréa LeBlanc<sup>1,2</sup>

<sup>1</sup>Lady Davis Institute for Medical Research at Jewish General Hospital, Montréal, Québec, Canada

<sup>2</sup>Department of Neurology and Neurosurgery, McGill University, Montréal, Québec, Canada

\*Corresponding author: Andrea LeBlanc, PhD, Bloomfield Center for Research in Aging, Lady Davis Institute for Medical Research, Sir Mortimer B Davis Jewish General Hospital, 3755 ch. Côte Ste-Catherine, Montréal, QC, Canada H3T 1E2. Tel.: +1 (514) 340 8222 ext 25303. e-mail address: [andrea.leblanc@mcgill.ca](mailto:andrea.leblanc@mcgill.ca)

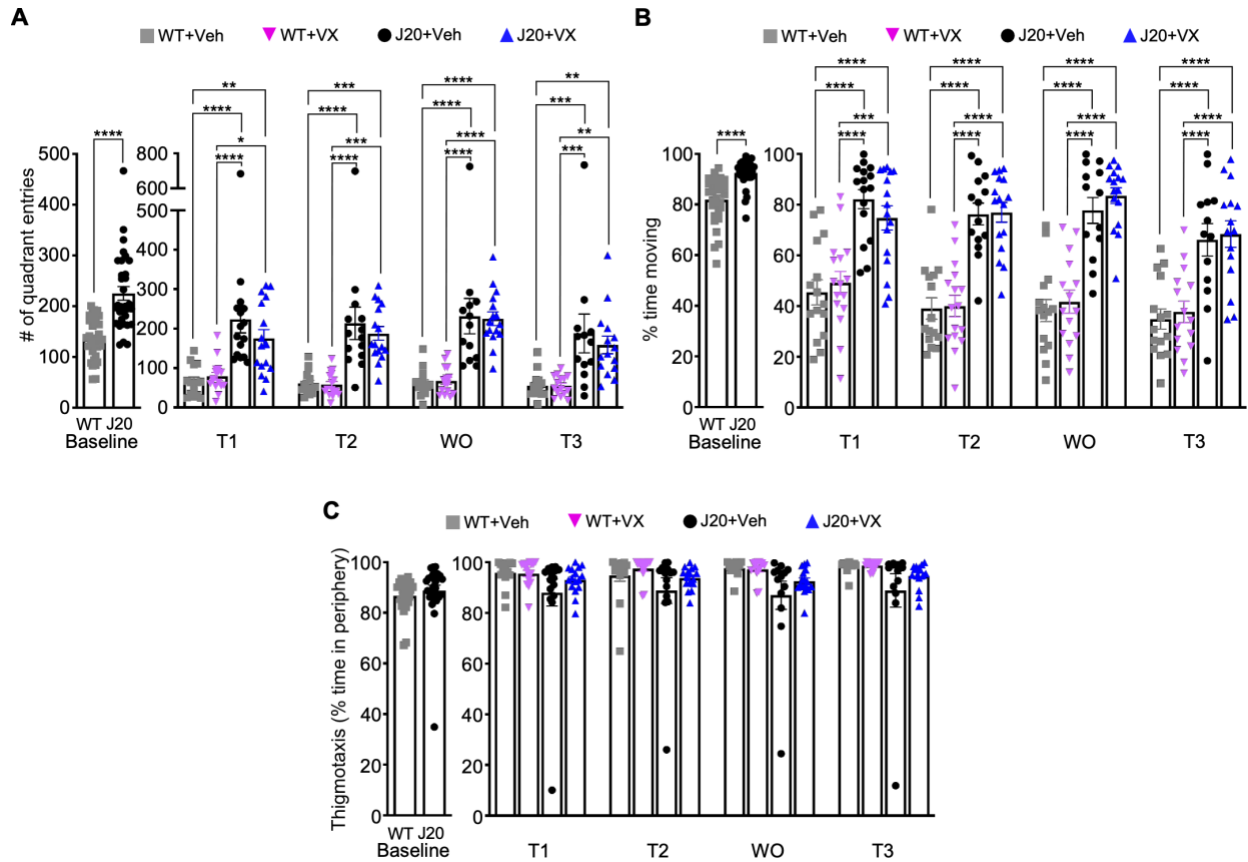

**Fig. S1. VX-765 does not reverse open field behaviour in aged J20 mice.** **A** Number of quadrant entries in the open field task at baseline [ $t = 5.91$ ,  $p < 0.0001$ , unpaired t-test] and at post-treatment T1 (3 injections), T2 (9 total injections), WO (1 month washout), and T3 (12 total injections) [ $F_{\text{time-point}} = 7.38$ ,  $p = 0.0001$ ;  $F_{\text{treatment}} = 14.98$ ,  $p < 0.0001$ ;  $F_{\text{interaction}} = 2.21$ ,  $p = 0.02$ , two-way ANOVA, Bonferroni's post-hoc]. **B** Percentage time moving in the open field task at baseline [ $t = 5.62$ ,  $p < 0.0001$ , unpaired t-test] and at post-treatment T1, T2, WO, and T3 [ $F_{\text{time-point}} = 11.26$ ,  $p < 0.0001$ ;  $F_{\text{treatment}} = 30.13$ ,  $p < 0.0001$ , two-way ANOVA, Bonferroni's post-hoc]. **C** Percentage time in the periphery, or thigmotaxis, in the open field task at baseline and at post-treatment T1, T2, WO, and T3. Bars represent mean  $\pm$  SEM; symbols denote performances of individual mice. \*  $p < 0.05$ , \*\*  $p < 0.01$ , \*\*\*  $p < 0.001$ , \*\*\*\*  $p < 0.0001$ .

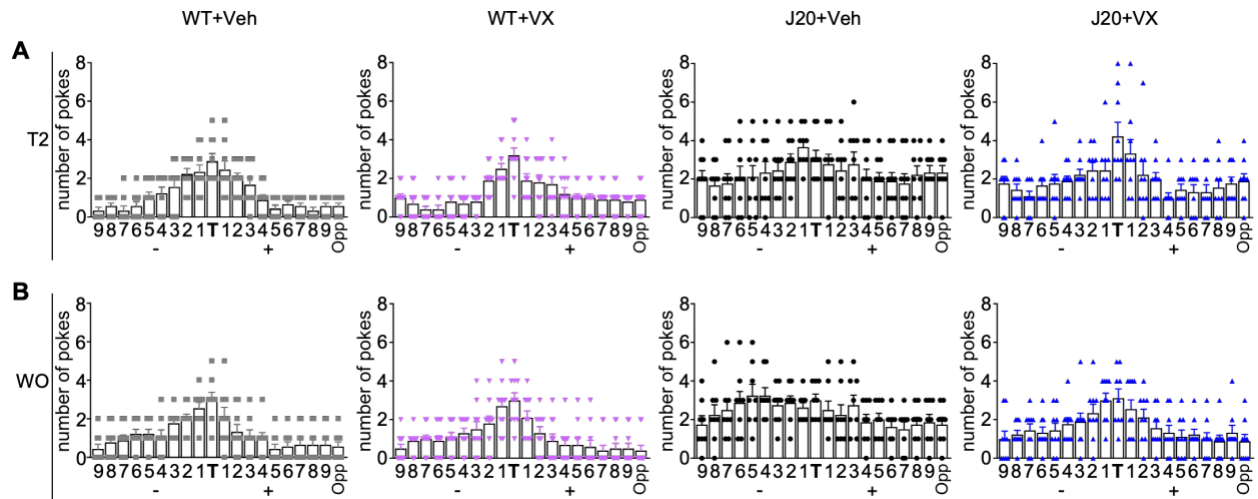

**Fig. S2. VX-765 reverses Barnes maze deficits in aged J20 mice. A-B** Barnes maze probe at **(A)** T2 and **(B)** WO showing distribution of nose “pokes” for each hole where (T) indicates target hole, +1 to 9 and – 1 to 9 indicates successive holes to the right and left of the target hole, respectively, and (Opp) indicates the hole directly opposite the target hole. Bars represent mean  $\pm$  SEM; symbols denote performances of individual mice.

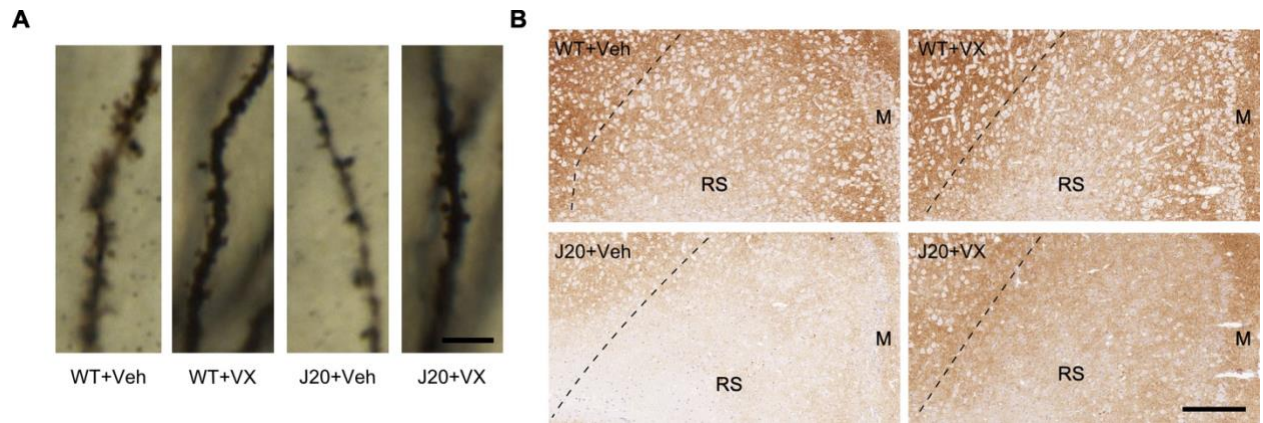

**Fig. S3. VX-765 reverses loss of synaptophysin levels in the cortex of 15-month-old J20 mice. A** Representative Golgi-Cox-stained dendritic spines in the hippocampal CA1 SR. Scale bar = 5  $\mu\text{m}$ . **B** Representative micrographs of synaptophysin staining from the midline (M) to the retrosplenial (RS) area of the cortex. Scale bar = 200  $\mu\text{m}$ .

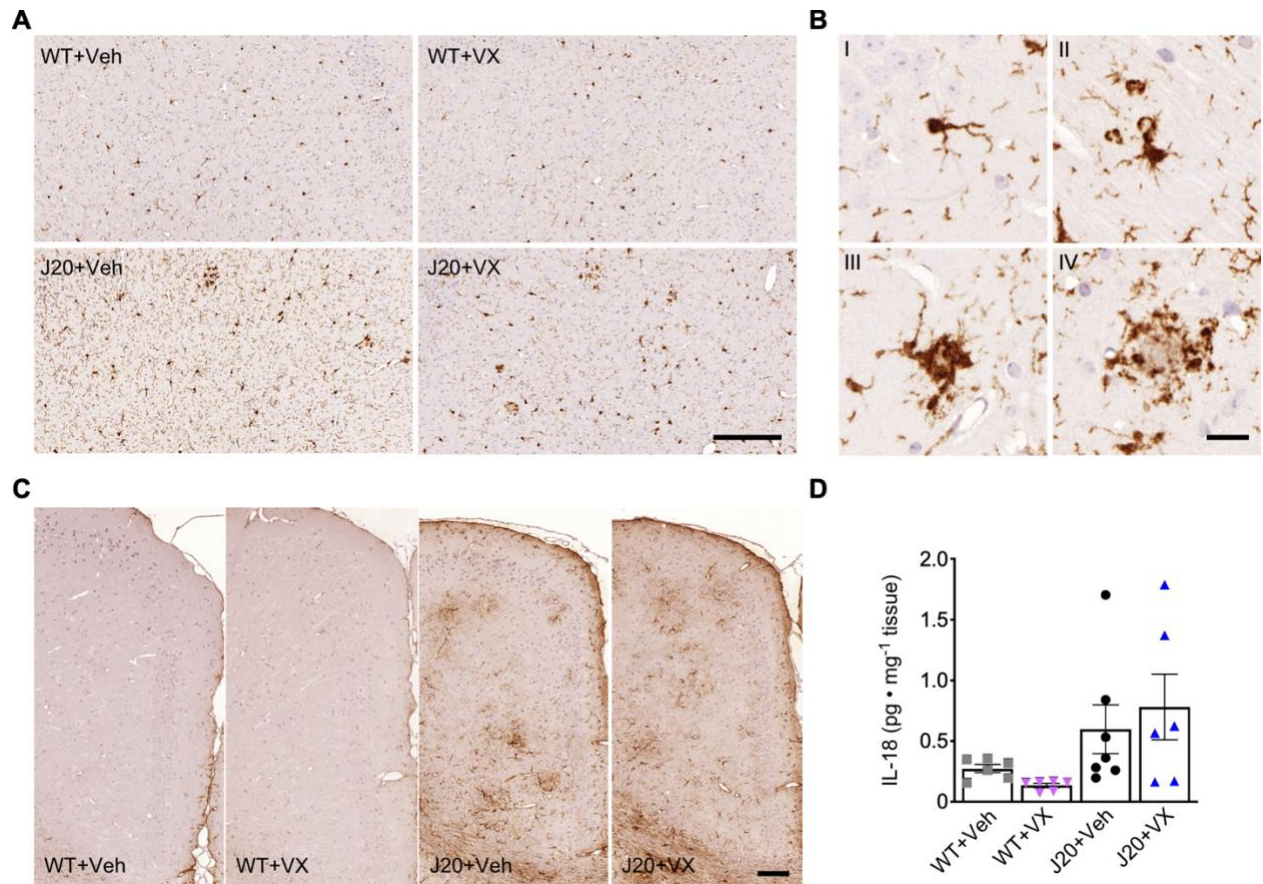

**Fig. S4. VX-765 does not reverse inflammation in the cortex of 15-month-old J20 mice. A** Representative micrographs of Iba1<sup>+</sup> microglial staining in the retrosplenial and motor areas of the cortex. Scale bar = 200  $\mu$ m. **B** Iba1<sup>+</sup> micrographs representing type I, II, III, and IV microglial subtypes. Scale bar = 20  $\mu$ m. **C** Representative GFAP<sup>+</sup> astrocyte staining in the retrosplenial cortex. Scale bar = 100  $\mu$ m. **D** IL-18 cortical protein levels measured with sandwich ELISA. Bars represent mean  $\pm$  SEM; symbols denote performances of individual mice.

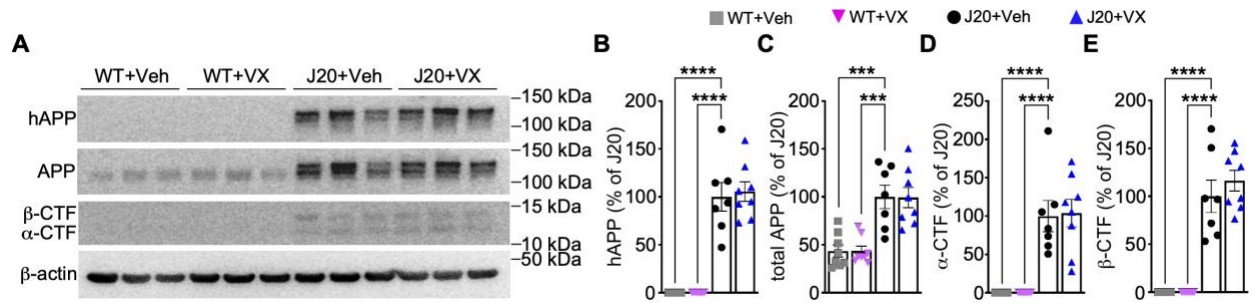

**Fig. S5. VX-765 does not affect APP and CTF in the cortex of 15-month-old J20 mice. A** Representative western blot images and **B-E** quantification of **B** human APP (hAPP) [ $F_{\text{genotype}} = 146.3$ ,  $p < 0.0001$ ], **C** total mouse + human APP [ $F_{\text{genotype}} = 40.65$ ,  $p < 0.0001$ ], **D** alpha ( $\alpha$ ) [ $F_{\text{genotype}} = 61.32$ ,  $p < 0.0001$ ] and **E** beta ( $\beta$ ) [ $F_{\text{genotype}} = 131.9$ ,  $p < 0.0001$ ] C-terminal fragments (CTF) in the cortex. Two-way ANOVA, Dunnett's post-hoc compared to J20+Veh for (B-E). Bars represent mean  $\pm$  SEM; symbols denote performances of individual mice. \*\*\*  $p < 0.001$ , \*\*\*\*  $p < 0.0001$ .

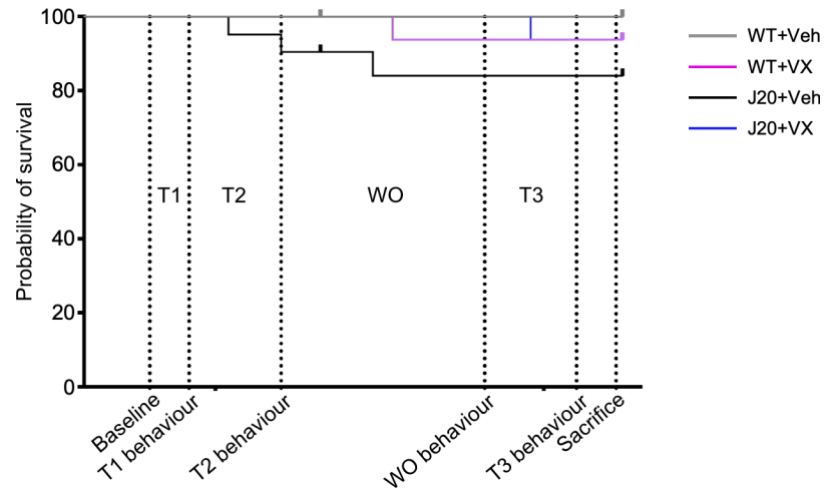

**Fig. S6. VX-765 does not affect survival in 15-month-old J20 mice.** Survival curve of WT and J20 mice during experimental paradigm. No significant differences found when comparing survival curves of the different treatment groups.
